# Supplementary material for: Characterization and RNA-Seq Analysis of Yellow-Green Leaf Mutants in Tomato
Source: MDPI journal article supplement (doi:10.3390/agronomy14040828), 2024-04-16
Supplement: s1 [file s1]

**Table S1 Primers used in this study**

| Primer                | 5'to3'                                       |
|-----------------------|----------------------------------------------|
| Solyc04g083160        | GAACGTGTGGGAGAGTCCTG<br>ACCCTTTTTCCAGCCCCAAA |
| <i>Solyc08g005710</i> | ACAACGACTTGCATGGGCTA<br>TCCTCCAACCACTCTTCCCA |
| <i>Solyc08g067330</i> | ACTGGTGACTACGGATGGGA<br>GCCTCCCCAACTTTAGGCT  |
| <i>Solyc09g059240</i> | CGAACCCTAGGACTCATGGC<br>AGTATGGTCCGTAAGGGGCT |
| <i>Solyc02g071030</i> | ATGGCCCTGACCGTGTTAAG<br>CTGAAGATCTGGGATCCGGC |
